# Supplementary material
Source: publisher site journal article supplement (https://www.dovepress.com/article/275645)
Supplement: Supplementary file 1 [file get_supplementary_file.php]

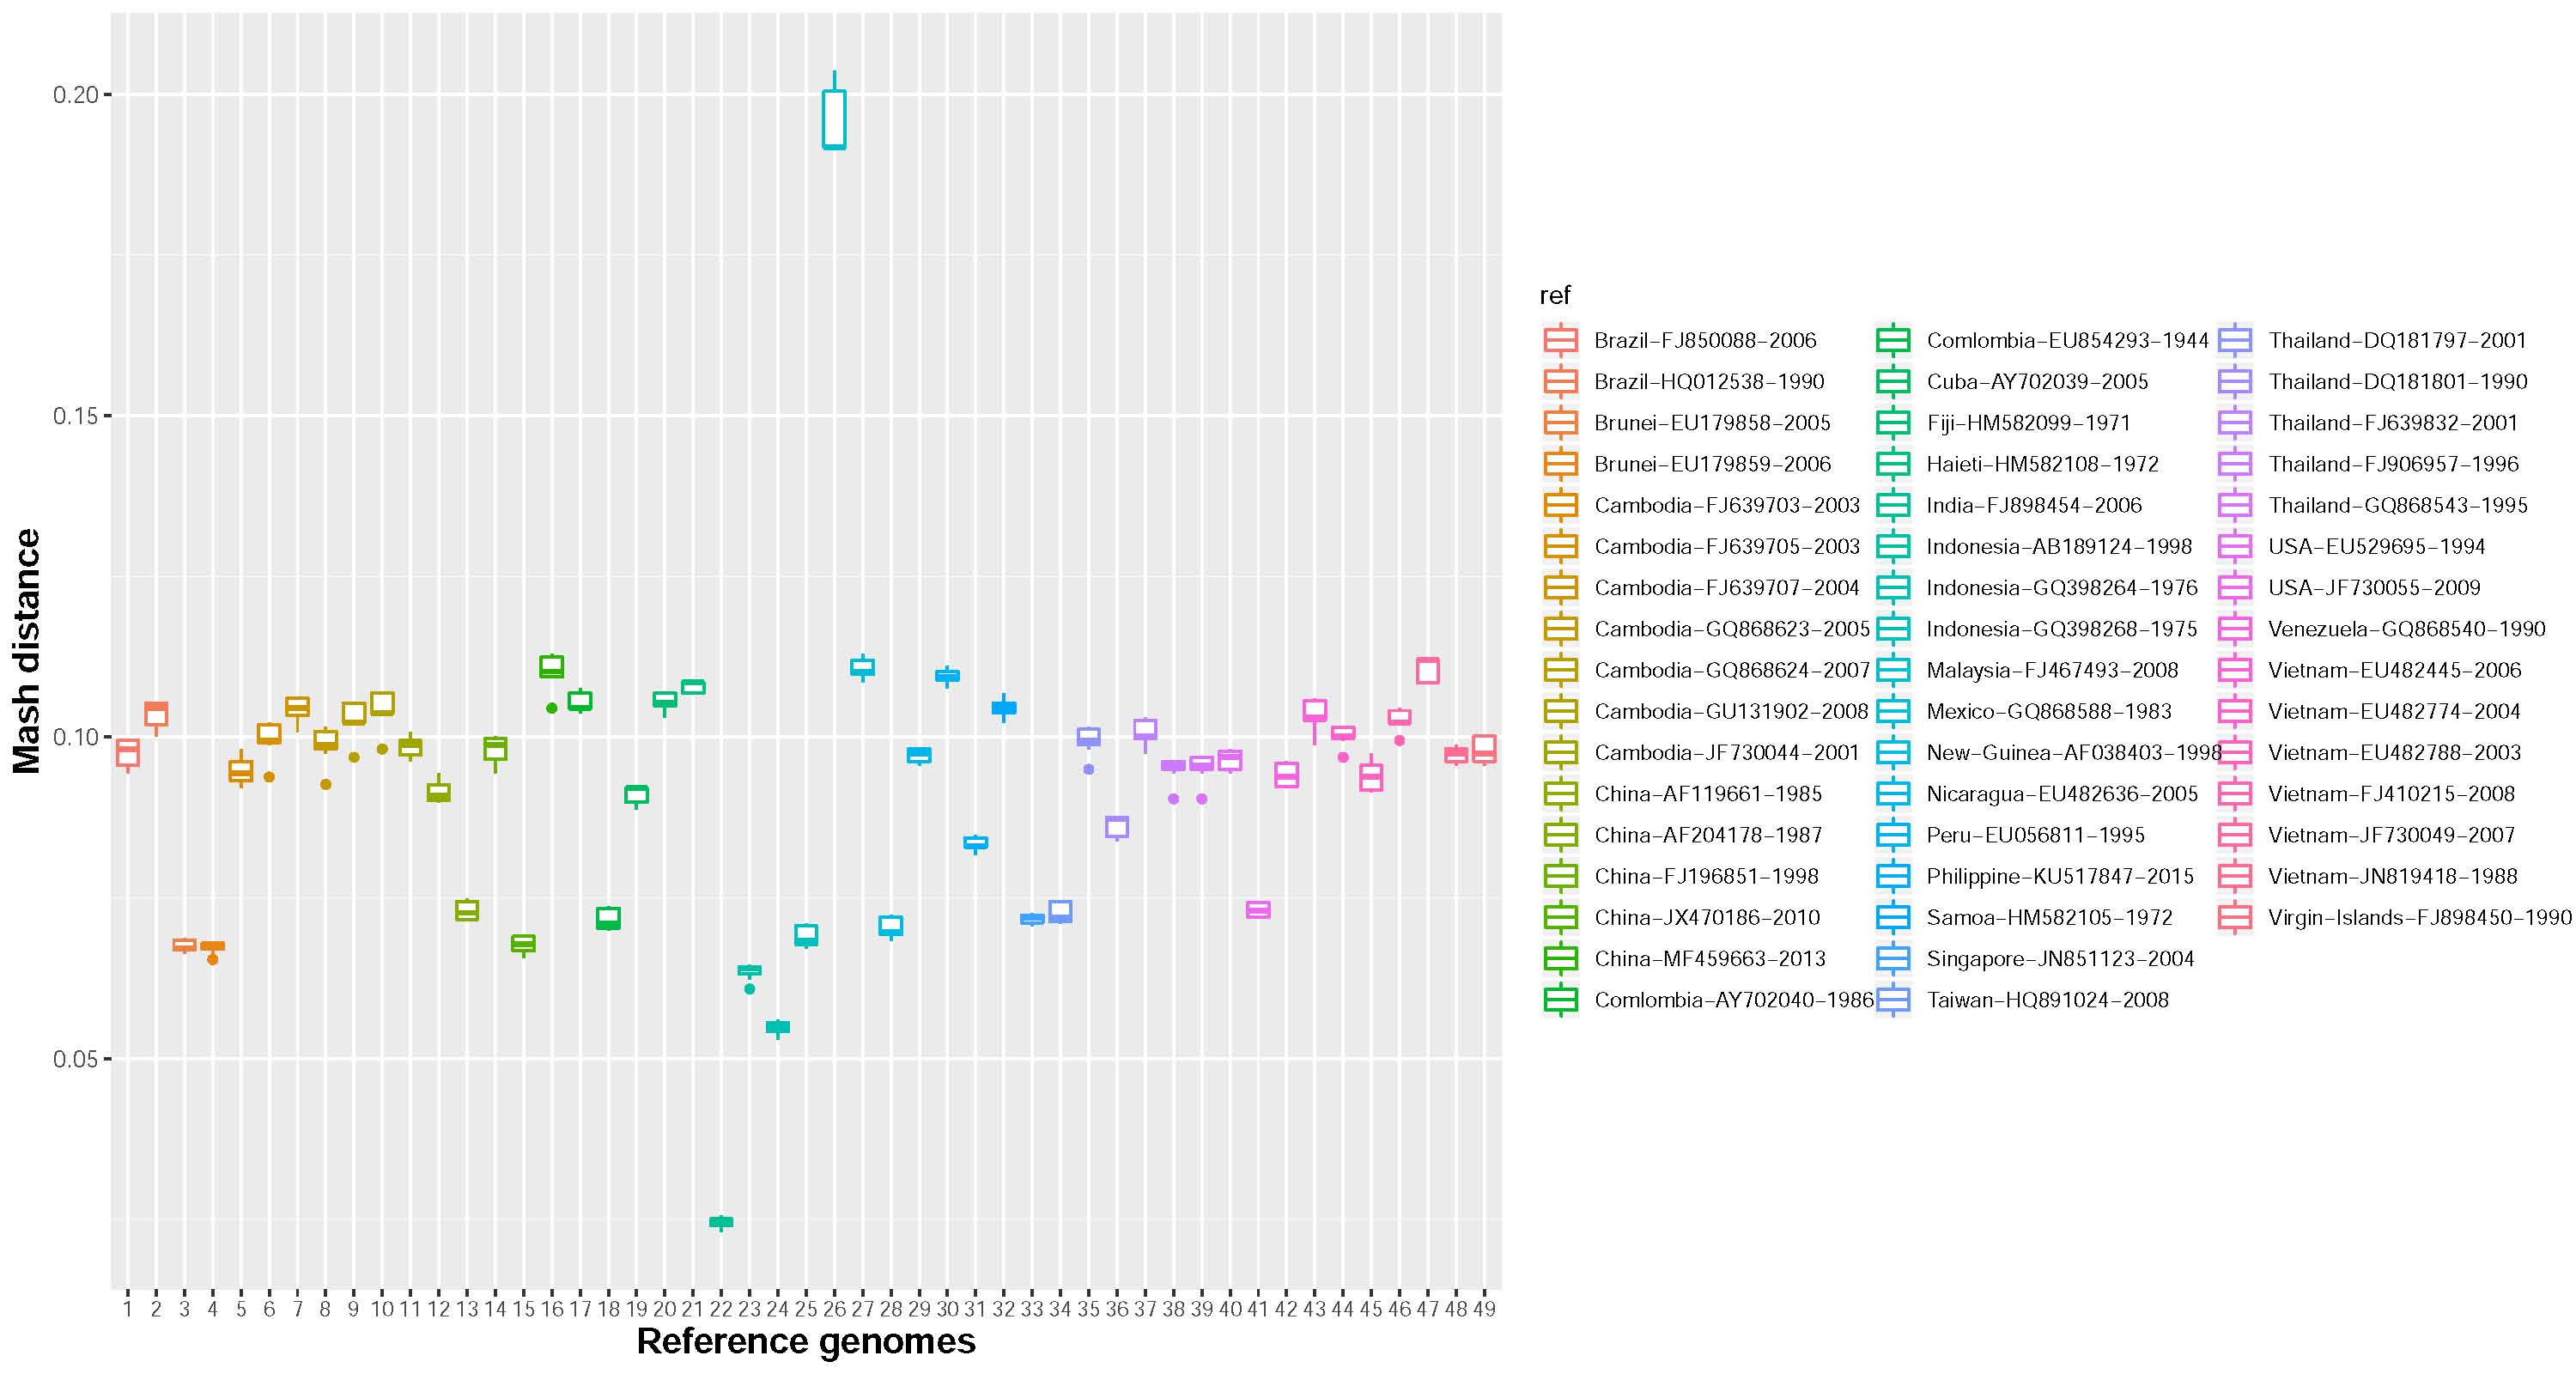


**Supplementary figure 1: The distance estimation between Dengue type 2 samples and references**. The box chart depicts the distribution position of the data (respectively from bottom to top). On each stripe, there is a box that represents the overall distance of each sample in the whole set of D2 samples with each of 49 references. The distance between Dengue type 2 sample and references was measure by Mash-distance.

| **Supplementary Figure 2: The data of Mash-distance of the DENV2 viruses** | | | | |
| --- | --- | --- | --- | --- |
|
|  |  |  |  |  |
| **Ref** | **Sample** | **Dist** | **p-value** | **Hashes** |
| Brazil-FJ850088-2006.fa | 1_D2.fas | 0.0968463 | 0 | 70/1000 |
| Brazil-HQ012538-1990.fa | 1_D2.fas | 0.105264 | 0 | 58/1000 |
| Brunei-EU179858-2005.fa | 1_D2.fas | 0.0665597 | 0 | 141/1000 |
| Brunei-EU179859-2006.fa | 1_D2.fas | 0.0662649 | 0 | 142/1000 |
| Cambodia-FJ639703-2003.fa | 1_D2.fas | 0.0943778 | 0 | 74/1000 |
| Cambodia-FJ639705-2003.fa | 1_D2.fas | 0.0937829 | 0 | 75/1000 |
| Cambodia-FJ639707-2004.fa | 1_D2.fas | 0.100846 | 0 | 64/1000 |
| Cambodia-GQ868623-2005.fa | 1_D2.fas | 0.0926182 | 0 | 77/1000 |
| Cambodia-GQ868624-2007.fa | 1_D2.fas | 0.0968463 | 0 | 70/1000 |
| Cambodia-GU131902-2008.fa | 1_D2.fas | 0.0981375 | 0 | 68/1000 |
| Cambodia-JF730044-2001.fa | 1_D2.fas | 0.0987984 | 0 | 67/1000 |
| China-AF119661-1985.fa | 1_D2.fas | 0.0903831 | 0 | 81/1000 |
| China-AF204178-1987.fa | 1_D2.fas | 0.0716227 | 0 | 125/1000 |
| China-FJ196851-1998.fa | 1_D2.fas | 0.0987984 | 0 | 67/1000 |
| China-JX470186-2010.fa | 1_D2.fas | 0.0656822 | 0 | 144/1000 |
| China-MF459663-2013.fa | 1_D2.fas | 0.104495 | 0 | 59/1000 |
| Comlombia-AY702040-1986.fa | 1_D2.fas | 0.104495 | 0 | 59/1000 |
| Comlombia-EU854293-1944.fa | 1_D2.fas | 0.0699663 | 0 | 130/1000 |
| Cuba-AY702039-2005.fa | 1_D2.fas | 0.0920479 | 0 | 78/1000 |
| Fiji-HM582099-1971.fa | 1_D2.fas | 0.104495 | 0 | 59/1000 |
| Haieti-HM582108-1972.fa | 1_D2.fas | 0.108487 | 0 | 54/1000 |
| India-FJ898454-2006.fa | 1_D2.fas | 0.0230782 | 0 | 445/1000 |
| Indonesia-AB189124-1998.fa | 1_D2.fas | 0.0608169 | 0 | 162/1000 |
| Indonesia-GQ398264-1976.fa | 1_D2.fas | 0.0529154 | 0 | 197/1000 |
| Indonesia-GQ398268-1975.fa | 1_D2.fas | 0.0671564 | 0 | 139/1000 |
| Malaysia-FJ467493-2008.fa | 1_D2.fas | 0.197292 | 1.17E-52 | 8/1000 |
| Mexico-GQ868588-1983.fa | 1_D2.fas | 0.109331 | 0 | 53/1000 |
| New-Guinea-AF038403-1998.fa | 1_D2.fas | 0.0683793 | 0 | 135/1000 |
| Nicaragua-EU482636-2005.fa | 1_D2.fas | 0.0981375 | 0 | 68/1000 |
| Peru-EU056811-1995.fa | 1_D2.fas | 0.108487 | 0 | 54/1000 |
| Philippine-KU517847-2015.fa | 1_D2.fas | 0.0816138 | 0 | 99/1000 |
| Samoa-HM582105-1972.fa | 1_D2.fas | 0.104495 | 0 | 59/1000 |
| Singapore-JN851123-2004.fa | 1_D2.fas | 0.0709514 | 0 | 127/1000 |
| Taiwan-HQ891024-2008.fa | 1_D2.fas | 0.0709514 | 0 | 127/1000 |
| Thailand-DQ181797-2001.fa | 1_D2.fas | 0.0949813 | 0 | 73/1000 |
| Thailand-DQ181801-1990.fa | 1_D2.fas | 0.0877506 | 0 | 86/1000 |
| Thailand-FJ639832-2001.fa | 1_D2.fas | 0.0974869 | 0 | 69/1000 |
| Thailand-FJ906957-1996.fa | 1_D2.fas | 0.0903831 | 0 | 81/1000 |
| Thailand-GQ868543-1995.fa | 1_D2.fas | 0.0903831 | 0 | 81/1000 |
| USA-EU529695-1994.fa | 1_D2.fas | 0.0968463 | 0 | 70/1000 |
| USA-JF730055-2009.fa | 1_D2.fas | 0.0719629 | 0 | 124/1000 |
| Venezuela-GQ868540-1990.fa | 1_D2.fas | 0.0937829 | 0 | 75/1000 |
| Vietnam-EU482445-2006.fa | 1_D2.fas | 0.0987984 | 0 | 67/1000 |
| Vietnam-EU482774-2004.fa | 1_D2.fas | 0.0968463 | 0 | 70/1000 |
| Vietnam-EU482788-2003.fa | 1_D2.fas | 0.0920479 | 0 | 78/1000 |
| Vietnam-FJ410215-2008.fa | 1_D2.fas | 0.0994698 | 0 | 66/1000 |
| Vietnam-JF730049-2007.fa | 1_D2.fas | 0.108487 | 0 | 54/1000 |
| Vietnam-JN819418-1988.fa | 1_D2.fas | 0.0987984 | 0 | 67/1000 |
| Virgin-Islands-FJ898450-1990.fa | 1_D2.fas | 0.0974869 | 0 | 69/1000 |
| Brazil-FJ850088-2006.fa | 2_D2.fas | 0.0994698 | 0 | 66/1000 |
| Brazil-HQ012538-1990.fa | 2_D2.fas | 0.105264 | 0 | 58/1000 |
| Brunei-EU179858-2005.fa | 2_D2.fas | 0.0683793 | 0 | 135/1000 |
| Brunei-EU179859-2006.fa | 2_D2.fas | 0.0677629 | 0 | 137/1000 |
| Cambodia-FJ639703-2003.fa | 2_D2.fas | 0.0962153 | 0 | 71/1000 |
| Cambodia-FJ639705-2003.fa | 2_D2.fas | 0.102268 | 0 | 62/1000 |
| Cambodia-FJ639707-2004.fa | 2_D2.fas | 0.106047 | 0 | 57/1000 |
| Cambodia-GQ868623-2005.fa | 2_D2.fas | 0.101551 | 0 | 63/1000 |
| Cambodia-GQ868624-2007.fa | 2_D2.fas | 0.105264 | 0 | 58/1000 |
| Cambodia-GU131902-2008.fa | 2_D2.fas | 0.106845 | 0 | 56/1000 |
| Cambodia-JF730044-2001.fa | 2_D2.fas | 0.0994698 | 0 | 66/1000 |
| China-AF119661-1985.fa | 2_D2.fas | 0.0926182 | 0 | 77/1000 |
| China-AF204178-1987.fa | 2_D2.fas | 0.0744324 | 0 | 117/1000 |
| China-FJ196851-1998.fa | 2_D2.fas | 0.100152 | 0 | 65/1000 |
| China-JX470186-2010.fa | 2_D2.fas | 0.0690061 | 0 | 133/1000 |
| China-MF459663-2013.fa | 2_D2.fas | 0.112887 | 0 | 49/1000 |
| Comlombia-AY702040-1986.fa | 2_D2.fas | 0.106845 | 0 | 56/1000 |
| Comlombia-EU854293-1944.fa | 2_D2.fas | 0.0733545 | 0 | 120/1000 |
| Cuba-AY702039-2005.fa | 2_D2.fas | 0.0920479 | 0 | 78/1000 |
| Fiji-HM582099-1971.fa | 2_D2.fas | 0.106845 | 0 | 56/1000 |
| Haieti-HM582108-1972.fa | 2_D2.fas | 0.108487 | 0 | 54/1000 |
| India-FJ898454-2006.fa | 2_D2.fas | 0.0245258 | 0 | 426/1000 |
| Indonesia-AB189124-1998.fa | 2_D2.fas | 0.0639874 | 0 | 150/1000 |
| Indonesia-GQ398264-1976.fa | 2_D2.fas | 0.0560862 | 0 | 182/1000 |
| Indonesia-GQ398268-1975.fa | 2_D2.fas | 0.0706202 | 0 | 128/1000 |
| Malaysia-FJ467493-2008.fa | 2_D2.fas | 0.191731 | 1.56E-59 | 9/1000 |
| Mexico-GQ868588-1983.fa | 2_D2.fas | 0.11197 | 0 | 50/1000 |
| New-Guinea-AF038403-1998.fa | 2_D2.fas | 0.0719629 | 0 | 124/1000 |
| Nicaragua-EU482636-2005.fa | 2_D2.fas | 0.0981375 | 0 | 68/1000 |
| Peru-EU056811-1995.fa | 2_D2.fas | 0.110193 | 0 | 52/1000 |
| Philippine-KU517847-2015.fa | 2_D2.fas | 0.0843302 | 0 | 93/1000 |
| Samoa-HM582105-1972.fa | 2_D2.fas | 0.105264 | 0 | 58/1000 |
| Singapore-JN851123-2004.fa | 2_D2.fas | 0.0719629 | 0 | 124/1000 |
| Taiwan-HQ891024-2008.fa | 2_D2.fas | 0.0744324 | 0 | 117/1000 |
| Thailand-DQ181797-2001.fa | 2_D2.fas | 0.101551 | 0 | 63/1000 |
| Thailand-DQ181801-1990.fa | 2_D2.fas | 0.0872439 | 0 | 87/1000 |
| Thailand-FJ639832-2001.fa | 2_D2.fas | 0.102997 | 0 | 61/1000 |
| Thailand-FJ906957-1996.fa | 2_D2.fas | 0.0962153 | 0 | 71/1000 |
| Thailand-GQ868543-1995.fa | 2_D2.fas | 0.0968463 | 0 | 70/1000 |
| USA-EU529695-1994.fa | 2_D2.fas | 0.0981375 | 0 | 68/1000 |
| USA-JF730055-2009.fa | 2_D2.fas | 0.0744324 | 0 | 117/1000 |
| Venezuela-GQ868540-1990.fa | 2_D2.fas | 0.0962153 | 0 | 71/1000 |
| Vietnam-EU482445-2006.fa | 2_D2.fas | 0.106047 | 0 | 57/1000 |
| Vietnam-EU482774-2004.fa | 2_D2.fas | 0.101551 | 0 | 63/1000 |
| Vietnam-EU482788-2003.fa | 2_D2.fas | 0.0955937 | 0 | 72/1000 |
| Vietnam-FJ410215-2008.fa | 2_D2.fas | 0.104495 | 0 | 59/1000 |
| Vietnam-JF730049-2007.fa | 2_D2.fas | 0.11197 | 0 | 50/1000 |
| Vietnam-JN819418-1988.fa | 2_D2.fas | 0.0981375 | 0 | 68/1000 |
| Virgin-Islands-FJ898450-1990.fa | 2_D2.fas | 0.100152 | 0 | 65/1000 |
| Brazil-FJ850088-2006.fa | 3_D2.fas | 0.0943778 | 0 | 74/1000 |
| Brazil-HQ012538-1990.fa | 3_D2.fas | 0.100152 | 0 | 65/1000 |
| Brunei-EU179858-2005.fa | 3_D2.fas | 0.0671564 | 0 | 139/1000 |
| Brunei-EU179859-2006.fa | 3_D2.fas | 0.0680698 | 0 | 136/1000 |
| Cambodia-FJ639703-2003.fa | 3_D2.fas | 0.0920479 | 0 | 78/1000 |
| Cambodia-FJ639705-2003.fa | 3_D2.fas | 0.0994698 | 0 | 66/1000 |
| Cambodia-FJ639707-2004.fa | 3_D2.fas | 0.104495 | 0 | 59/1000 |
| Cambodia-GQ868623-2005.fa | 3_D2.fas | 0.0987984 | 0 | 67/1000 |
| Cambodia-GQ868624-2007.fa | 3_D2.fas | 0.102268 | 0 | 62/1000 |
| Cambodia-GU131902-2008.fa | 3_D2.fas | 0.10374 | 0 | 60/1000 |
| Cambodia-JF730044-2001.fa | 3_D2.fas | 0.0962153 | 0 | 71/1000 |
| China-AF119661-1985.fa | 3_D2.fas | 0.0898429 | 0 | 82/1000 |
| China-AF204178-1987.fa | 3_D2.fas | 0.0716227 | 0 | 125/1000 |
| China-FJ196851-1998.fa | 3_D2.fas | 0.0943778 | 0 | 74/1000 |
| China-JX470186-2010.fa | 3_D2.fas | 0.0677629 | 0 | 137/1000 |
| China-MF459663-2013.fa | 3_D2.fas | 0.109331 | 0 | 53/1000 |
| Comlombia-AY702040-1986.fa | 3_D2.fas | 0.104495 | 0 | 59/1000 |
| Comlombia-EU854293-1944.fa | 3_D2.fas | 0.0702918 | 0 | 129/1000 |
| Cuba-AY702039-2005.fa | 3_D2.fas | 0.0887833 | 0 | 84/1000 |
| Fiji-HM582099-1971.fa | 3_D2.fas | 0.105264 | 0 | 58/1000 |
| Haieti-HM582108-1972.fa | 3_D2.fas | 0.106845 | 0 | 56/1000 |
| India-FJ898454-2006.fa | 3_D2.fas | 0.0255655 | 0 | 413/1000 |
| Indonesia-AB189124-1998.fa | 3_D2.fas | 0.0642645 | 0 | 149/1000 |
| Indonesia-GQ398264-1976.fa | 3_D2.fas | 0.0549966 | 0 | 187/1000 |
| Indonesia-GQ398268-1975.fa | 3_D2.fas | 0.0677629 | 0 | 137/1000 |
| Malaysia-FJ467493-2008.fa | 3_D2.fas | 0.191731 | 1.56E-59 | 9/1000 |
| Mexico-GQ868588-1983.fa | 3_D2.fas | 0.110193 | 0 | 52/1000 |
| New-Guinea-AF038403-1998.fa | 3_D2.fas | 0.0693234 | 0 | 132/1000 |
| Nicaragua-EU482636-2005.fa | 3_D2.fas | 0.0955937 | 0 | 72/1000 |
| Peru-EU056811-1995.fa | 3_D2.fas | 0.109331 | 0 | 53/1000 |
| Philippine-KU517847-2015.fa | 3_D2.fas | 0.0829489 | 0 | 96/1000 |
| Samoa-HM582105-1972.fa | 3_D2.fas | 0.10374 | 0 | 60/1000 |
| Singapore-JN851123-2004.fa | 3_D2.fas | 0.0726524 | 0 | 122/1000 |
| Taiwan-HQ891024-2008.fa | 3_D2.fas | 0.0712856 | 0 | 126/1000 |
| Thailand-DQ181797-2001.fa | 3_D2.fas | 0.0994698 | 0 | 66/1000 |
| Thailand-DQ181801-1990.fa | 3_D2.fas | 0.0838645 | 0 | 94/1000 |
| Thailand-FJ639832-2001.fa | 3_D2.fas | 0.100152 | 0 | 65/1000 |
| Thailand-FJ906957-1996.fa | 3_D2.fas | 0.0955937 | 0 | 72/1000 |
| Thailand-GQ868543-1995.fa | 3_D2.fas | 0.0955937 | 0 | 72/1000 |
| USA-EU529695-1994.fa | 3_D2.fas | 0.0949813 | 0 | 73/1000 |
| USA-JF730055-2009.fa | 3_D2.fas | 0.0719629 | 0 | 124/1000 |
| Venezuela-GQ868540-1990.fa | 3_D2.fas | 0.0920479 | 0 | 78/1000 |
| Vietnam-EU482445-2006.fa | 3_D2.fas | 0.102997 | 0 | 61/1000 |
| Vietnam-EU482774-2004.fa | 3_D2.fas | 0.100152 | 0 | 65/1000 |
| Vietnam-EU482788-2003.fa | 3_D2.fas | 0.0914855 | 0 | 79/1000 |
| Vietnam-FJ410215-2008.fa | 3_D2.fas | 0.102268 | 0 | 62/1000 |
| Vietnam-JF730049-2007.fa | 3_D2.fas | 0.108487 | 0 | 54/1000 |
| Vietnam-JN819418-1988.fa | 3_D2.fas | 0.0955937 | 0 | 72/1000 |
| Virgin-Islands-FJ898450-1990.fa | 3_D2.fas | 0.0955937 | 0 | 72/1000 |
| Brazil-FJ850088-2006.fa | 4_D2.fas | 0.0994698 | 0 | 66/1000 |
| Brazil-HQ012538-1990.fa | 4_D2.fas | 0.104495 | 0 | 59/1000 |
| Brunei-EU179858-2005.fa | 4_D2.fas | 0.0686914 | 0 | 134/1000 |
| Brunei-EU179859-2006.fa | 4_D2.fas | 0.0677629 | 0 | 137/1000 |
| Cambodia-FJ639703-2003.fa | 4_D2.fas | 0.0981375 | 0 | 68/1000 |
| Cambodia-FJ639705-2003.fa | 4_D2.fas | 0.101551 | 0 | 63/1000 |
| Cambodia-FJ639707-2004.fa | 4_D2.fas | 0.106047 | 0 | 57/1000 |
| Cambodia-GQ868623-2005.fa | 4_D2.fas | 0.100152 | 0 | 65/1000 |
| Cambodia-GQ868624-2007.fa | 4_D2.fas | 0.105264 | 0 | 58/1000 |
| Cambodia-GU131902-2008.fa | 4_D2.fas | 0.106845 | 0 | 56/1000 |
| Cambodia-JF730044-2001.fa | 4_D2.fas | 0.100846 | 0 | 64/1000 |
| China-AF119661-1985.fa | 4_D2.fas | 0.0943778 | 0 | 74/1000 |
| China-AF204178-1987.fa | 4_D2.fas | 0.0747985 | 0 | 116/1000 |
| China-FJ196851-1998.fa | 4_D2.fas | 0.0994698 | 0 | 66/1000 |
| China-JX470186-2010.fa | 4_D2.fas | 0.0690061 | 0 | 133/1000 |
| China-MF459663-2013.fa | 4_D2.fas | 0.11197 | 0 | 50/1000 |
| Comlombia-AY702040-1986.fa | 4_D2.fas | 0.107658 | 0 | 55/1000 |
| Comlombia-EU854293-1944.fa | 4_D2.fas | 0.0737105 | 0 | 119/1000 |
| Cuba-AY702039-2005.fa | 4_D2.fas | 0.0920479 | 0 | 78/1000 |
| Fiji-HM582099-1971.fa | 4_D2.fas | 0.106845 | 0 | 56/1000 |
| Haieti-HM582108-1972.fa | 4_D2.fas | 0.108487 | 0 | 54/1000 |
| India-FJ898454-2006.fa | 4_D2.fas | 0.0240597 | 0 | 432/1000 |
| Indonesia-AB189124-1998.fa | 4_D2.fas | 0.0645437 | 0 | 148/1000 |
| Indonesia-GQ398264-1976.fa | 4_D2.fas | 0.0549966 | 0 | 187/1000 |
| Indonesia-GQ398268-1975.fa | 4_D2.fas | 0.0709514 | 0 | 127/1000 |
| Malaysia-FJ467493-2008.fa | 4_D2.fas | 0.203604 | 7.71E-46 | 7/1000 |
| Mexico-GQ868588-1983.fa | 4_D2.fas | 0.112887 | 0 | 49/1000 |
| New-Guinea-AF038403-1998.fa | 4_D2.fas | 0.0723061 | 0 | 123/1000 |
| Nicaragua-EU482636-2005.fa | 4_D2.fas | 0.0974869 | 0 | 69/1000 |
| Peru-EU056811-1995.fa | 4_D2.fas | 0.111073 | 0 | 51/1000 |
| Philippine-KU517847-2015.fa | 4_D2.fas | 0.0848014 | 0 | 92/1000 |
| Samoa-HM582105-1972.fa | 4_D2.fas | 0.106845 | 0 | 56/1000 |
| Singapore-JN851123-2004.fa | 4_D2.fas | 0.0712856 | 0 | 126/1000 |
| Taiwan-HQ891024-2008.fa | 4_D2.fas | 0.0744324 | 0 | 117/1000 |
| Thailand-DQ181797-2001.fa | 4_D2.fas | 0.100846 | 0 | 64/1000 |
| Thailand-DQ181801-1990.fa | 4_D2.fas | 0.0877506 | 0 | 86/1000 |
| Thailand-FJ639832-2001.fa | 4_D2.fas | 0.102268 | 0 | 62/1000 |
| Thailand-FJ906957-1996.fa | 4_D2.fas | 0.0962153 | 0 | 71/1000 |
| Thailand-GQ868543-1995.fa | 4_D2.fas | 0.0968463 | 0 | 70/1000 |
| USA-EU529695-1994.fa | 4_D2.fas | 0.0974869 | 0 | 69/1000 |
| USA-JF730055-2009.fa | 4_D2.fas | 0.0740698 | 0 | 118/1000 |
| Venezuela-GQ868540-1990.fa | 4_D2.fas | 0.0955937 | 0 | 72/1000 |
| Vietnam-EU482445-2006.fa | 4_D2.fas | 0.105264 | 0 | 58/1000 |
| Vietnam-EU482774-2004.fa | 4_D2.fas | 0.101551 | 0 | 63/1000 |
| Vietnam-EU482788-2003.fa | 4_D2.fas | 0.0974869 | 0 | 69/1000 |
| Vietnam-FJ410215-2008.fa | 4_D2.fas | 0.10374 | 0 | 60/1000 |
| Vietnam-JF730049-2007.fa | 4_D2.fas | 0.11197 | 0 | 50/1000 |
| Vietnam-JN819418-1988.fa | 4_D2.fas | 0.0968463 | 0 | 70/1000 |
| Virgin-Islands-FJ898450-1990.fa | 4_D2.fas | 0.100152 | 0 | 65/1000 |
| Brazil-FJ850088-2006.fa | 5_D2.fas | 0.0981375 | 0 | 68/1000 |
| Brazil-HQ012538-1990.fa | 5_D2.fas | 0.10374 | 0 | 60/1000 |
| Brunei-EU179858-2005.fa | 5_D2.fas | 0.0662649 | 0 | 142/1000 |
| Brunei-EU179859-2006.fa | 5_D2.fas | 0.0653942 | 0 | 145/1000 |
| Cambodia-FJ639703-2003.fa | 5_D2.fas | 0.0943778 | 0 | 74/1000 |
| Cambodia-FJ639705-2003.fa | 5_D2.fas | 0.0987984 | 0 | 67/1000 |
| Cambodia-FJ639707-2004.fa | 5_D2.fas | 0.102268 | 0 | 62/1000 |
| Cambodia-GQ868623-2005.fa | 5_D2.fas | 0.0974869 | 0 | 69/1000 |
| Cambodia-GQ868624-2007.fa | 5_D2.fas | 0.102268 | 0 | 62/1000 |
| Cambodia-GU131902-2008.fa | 5_D2.fas | 0.10374 | 0 | 60/1000 |
| Cambodia-JF730044-2001.fa | 5_D2.fas | 0.0981375 | 0 | 68/1000 |
| China-AF119661-1985.fa | 5_D2.fas | 0.0909306 | 0 | 80/1000 |
| China-AF204178-1987.fa | 5_D2.fas | 0.0726524 | 0 | 122/1000 |
| China-FJ196851-1998.fa | 5_D2.fas | 0.0987984 | 0 | 67/1000 |
| China-JX470186-2010.fa | 5_D2.fas | 0.0656822 | 0 | 144/1000 |
| China-MF459663-2013.fa | 5_D2.fas | 0.110193 | 0 | 52/1000 |
| Comlombia-AY702040-1986.fa | 5_D2.fas | 0.10374 | 0 | 60/1000 |
| Comlombia-EU854293-1944.fa | 5_D2.fas | 0.0709514 | 0 | 127/1000 |
| Cuba-AY702039-2005.fa | 5_D2.fas | 0.0909306 | 0 | 80/1000 |
| Fiji-HM582099-1971.fa | 5_D2.fas | 0.102997 | 0 | 61/1000 |
| Haieti-HM582108-1972.fa | 5_D2.fas | 0.106845 | 0 | 56/1000 |
| India-FJ898454-2006.fa | 5_D2.fas | 0.0239063 | 0 | 434/1000 |
| Indonesia-AB189124-1998.fa | 5_D2.fas | 0.0623675 | 0 | 156/1000 |
| Indonesia-GQ398264-1976.fa | 5_D2.fas | 0.0533217 | 0 | 195/1000 |
| Indonesia-GQ398268-1975.fa | 5_D2.fas | 0.0683793 | 0 | 135/1000 |
| Malaysia-FJ467493-2008.fa | 5_D2.fas | 0.203604 | 7.71E-46 | 7/1000 |
| Mexico-GQ868588-1983.fa | 5_D2.fas | 0.108487 | 0 | 54/1000 |
| New-Guinea-AF038403-1998.fa | 5_D2.fas | 0.0696435 | 0 | 131/1000 |
| Nicaragua-EU482636-2005.fa | 5_D2.fas | 0.0968463 | 0 | 70/1000 |
| Peru-EU056811-1995.fa | 5_D2.fas | 0.107658 | 0 | 55/1000 |
| Philippine-KU517847-2015.fa | 5_D2.fas | 0.0829489 | 0 | 96/1000 |
| Samoa-HM582105-1972.fa | 5_D2.fas | 0.102268 | 0 | 62/1000 |
| Singapore-JN851123-2004.fa | 5_D2.fas | 0.0706202 | 0 | 128/1000 |
| Taiwan-HQ891024-2008.fa | 5_D2.fas | 0.0719629 | 0 | 124/1000 |
| Thailand-DQ181797-2001.fa | 5_D2.fas | 0.0981375 | 0 | 68/1000 |
| Thailand-DQ181801-1990.fa | 5_D2.fas | 0.0852783 | 0 | 91/1000 |
| Thailand-FJ639832-2001.fa | 5_D2.fas | 0.0994698 | 0 | 66/1000 |
| Thailand-FJ906957-1996.fa | 5_D2.fas | 0.0943778 | 0 | 74/1000 |
| Thailand-GQ868543-1995.fa | 5_D2.fas | 0.0943778 | 0 | 74/1000 |
| USA-EU529695-1994.fa | 5_D2.fas | 0.0943778 | 0 | 74/1000 |
| USA-JF730055-2009.fa | 5_D2.fas | 0.0730018 | 0 | 121/1000 |
| Venezuela-GQ868540-1990.fa | 5_D2.fas | 0.0926182 | 0 | 77/1000 |
| Vietnam-EU482445-2006.fa | 5_D2.fas | 0.102268 | 0 | 62/1000 |
| Vietnam-EU482774-2004.fa | 5_D2.fas | 0.0994698 | 0 | 66/1000 |
| Vietnam-EU482788-2003.fa | 5_D2.fas | 0.0937829 | 0 | 75/1000 |
| Vietnam-FJ410215-2008.fa | 5_D2.fas | 0.102268 | 0 | 62/1000 |
| Vietnam-JF730049-2007.fa | 5_D2.fas | 0.11197 | 0 | 50/1000 |
| Vietnam-JN819418-1988.fa | 5_D2.fas | 0.0974869 | 0 | 69/1000 |
| Virgin-Islands-FJ898450-1990.fa | 5_D2.fas | 0.0968463 | 0 | 70/1000 |
| Brazil-FJ850088-2006.fa | 6_D2.fas | 0.0943778 | 0 | 74/1000 |
| Brazil-HQ012538-1990.fa | 6_D2.fas | 0.100152 | 0 | 65/1000 |
| Brunei-EU179858-2005.fa | 6_D2.fas | 0.0671564 | 0 | 139/1000 |
| Brunei-EU179859-2006.fa | 6_D2.fas | 0.0680698 | 0 | 136/1000 |
| Cambodia-FJ639703-2003.fa | 6_D2.fas | 0.0920479 | 0 | 78/1000 |
| Cambodia-FJ639705-2003.fa | 6_D2.fas | 0.0994698 | 0 | 66/1000 |
| Cambodia-FJ639707-2004.fa | 6_D2.fas | 0.104495 | 0 | 59/1000 |
| Cambodia-GQ868623-2005.fa | 6_D2.fas | 0.0987984 | 0 | 67/1000 |
| Cambodia-GQ868624-2007.fa | 6_D2.fas | 0.102268 | 0 | 62/1000 |
| Cambodia-GU131902-2008.fa | 6_D2.fas | 0.10374 | 0 | 60/1000 |
| Cambodia-JF730044-2001.fa | 6_D2.fas | 0.0962153 | 0 | 71/1000 |
| China-AF119661-1985.fa | 6_D2.fas | 0.0898429 | 0 | 82/1000 |
| China-AF204178-1987.fa | 6_D2.fas | 0.0716227 | 0 | 125/1000 |
| China-FJ196851-1998.fa | 6_D2.fas | 0.0943778 | 0 | 74/1000 |
| China-JX470186-2010.fa | 6_D2.fas | 0.0677629 | 0 | 137/1000 |
| China-MF459663-2013.fa | 6_D2.fas | 0.109331 | 0 | 53/1000 |
| Comlombia-AY702040-1986.fa | 6_D2.fas | 0.104495 | 0 | 59/1000 |
| Comlombia-EU854293-1944.fa | 6_D2.fas | 0.0702918 | 0 | 129/1000 |
| Cuba-AY702039-2005.fa | 6_D2.fas | 0.0887833 | 0 | 84/1000 |
| Fiji-HM582099-1971.fa | 6_D2.fas | 0.105264 | 0 | 58/1000 |
| Haieti-HM582108-1972.fa | 6_D2.fas | 0.106845 | 0 | 56/1000 |
| India-FJ898454-2006.fa | 6_D2.fas | 0.0255655 | 0 | 413/1000 |
| Indonesia-AB189124-1998.fa | 6_D2.fas | 0.0642645 | 0 | 149/1000 |
| Indonesia-GQ398264-1976.fa | 6_D2.fas | 0.0549966 | 0 | 187/1000 |
| Indonesia-GQ398268-1975.fa | 6_D2.fas | 0.0677629 | 0 | 137/1000 |
| Malaysia-FJ467493-2008.fa | 6_D2.fas | 0.191731 | 1.56E-59 | 9/1000 |
| Mexico-GQ868588-1983.fa | 6_D2.fas | 0.110193 | 0 | 52/1000 |
| New-Guinea-AF038403-1998.fa | 6_D2.fas | 0.0693234 | 0 | 132/1000 |
| Nicaragua-EU482636-2005.fa | 6_D2.fas | 0.0955937 | 0 | 72/1000 |
| Peru-EU056811-1995.fa | 6_D2.fas | 0.109331 | 0 | 53/1000 |
| Philippine-KU517847-2015.fa | 6_D2.fas | 0.0829489 | 0 | 96/1000 |
| Samoa-HM582105-1972.fa | 6_D2.fas | 0.10374 | 0 | 60/1000 |
| Singapore-JN851123-2004.fa | 6_D2.fas | 0.0726524 | 0 | 122/1000 |
| Taiwan-HQ891024-2008.fa | 6_D2.fas | 0.0712856 | 0 | 126/1000 |
| Thailand-DQ181797-2001.fa | 6_D2.fas | 0.0994698 | 0 | 66/1000 |
| Thailand-DQ181801-1990.fa | 6_D2.fas | 0.0838645 | 0 | 94/1000 |
| Thailand-FJ639832-2001.fa | 6_D2.fas | 0.100152 | 0 | 65/1000 |
| Thailand-FJ906957-1996.fa | 6_D2.fas | 0.0955937 | 0 | 72/1000 |
| Thailand-GQ868543-1995.fa | 6_D2.fas | 0.0955937 | 0 | 72/1000 |
| USA-EU529695-1994.fa | 6_D2.fas | 0.0949813 | 0 | 73/1000 |
| USA-JF730055-2009.fa | 6_D2.fas | 0.0719629 | 0 | 124/1000 |
| Venezuela-GQ868540-1990.fa | 6_D2.fas | 0.0920479 | 0 | 78/1000 |
| Vietnam-EU482445-2006.fa | 6_D2.fas | 0.102997 | 0 | 61/1000 |
| Vietnam-EU482774-2004.fa | 6_D2.fas | 0.100152 | 0 | 65/1000 |
| Vietnam-EU482788-2003.fa | 6_D2.fas | 0.0914855 | 0 | 79/1000 |
| Vietnam-FJ410215-2008.fa | 6_D2.fas | 0.102268 | 0 | 62/1000 |
| Vietnam-JF730049-2007.fa | 6_D2.fas | 0.108487 | 0 | 54/1000 |
| Vietnam-JN819418-1988.fa | 6_D2.fas | 0.0955937 | 0 | 72/1000 |
| Virgin-Islands-FJ898450-1990.fa | 6_D2.fas | 0.0955937 | 0 | 72/1000 |
| Brazil-FJ850088-2006.fa | 7_D2.fas | 0.0994698 | 0 | 66/1000 |
| Brazil-HQ012538-1990.fa | 7_D2.fas | 0.105264 | 0 | 58/1000 |
| Brunei-EU179858-2005.fa | 7_D2.fas | 0.0683793 | 0 | 135/1000 |
| Brunei-EU179859-2006.fa | 7_D2.fas | 0.0677629 | 0 | 137/1000 |
| Cambodia-FJ639703-2003.fa | 7_D2.fas | 0.0962153 | 0 | 71/1000 |
| Cambodia-FJ639705-2003.fa | 7_D2.fas | 0.102268 | 0 | 62/1000 |
| Cambodia-FJ639707-2004.fa | 7_D2.fas | 0.106047 | 0 | 57/1000 |
| Cambodia-GQ868623-2005.fa | 7_D2.fas | 0.101551 | 0 | 63/1000 |
| Cambodia-GQ868624-2007.fa | 7_D2.fas | 0.105264 | 0 | 58/1000 |
| Cambodia-GU131902-2008.fa | 7_D2.fas | 0.106845 | 0 | 56/1000 |
| Cambodia-JF730044-2001.fa | 7_D2.fas | 0.0994698 | 0 | 66/1000 |
| China-AF119661-1985.fa | 7_D2.fas | 0.0926182 | 0 | 77/1000 |
| China-AF204178-1987.fa | 7_D2.fas | 0.0744324 | 0 | 117/1000 |
| China-FJ196851-1998.fa | 7_D2.fas | 0.100152 | 0 | 65/1000 |
| China-JX470186-2010.fa | 7_D2.fas | 0.0690061 | 0 | 133/1000 |
| China-MF459663-2013.fa | 7_D2.fas | 0.112887 | 0 | 49/1000 |
| Comlombia-AY702040-1986.fa | 7_D2.fas | 0.106845 | 0 | 56/1000 |
| Comlombia-EU854293-1944.fa | 7_D2.fas | 0.0733545 | 0 | 120/1000 |
| Cuba-AY702039-2005.fa | 7_D2.fas | 0.0920479 | 0 | 78/1000 |
| Fiji-HM582099-1971.fa | 7_D2.fas | 0.106845 | 0 | 56/1000 |
| Haieti-HM582108-1972.fa | 7_D2.fas | 0.108487 | 0 | 54/1000 |
| India-FJ898454-2006.fa | 7_D2.fas | 0.0245258 | 0 | 426/1000 |
| Indonesia-AB189124-1998.fa | 7_D2.fas | 0.0639874 | 0 | 150/1000 |
| Indonesia-GQ398264-1976.fa | 7_D2.fas | 0.0560862 | 0 | 182/1000 |
| Indonesia-GQ398268-1975.fa | 7_D2.fas | 0.0706202 | 0 | 128/1000 |
| Malaysia-FJ467493-2008.fa | 7_D2.fas | 0.191731 | 1.56E-59 | 9/1000 |
| Mexico-GQ868588-1983.fa | 7_D2.fas | 0.11197 | 0 | 50/1000 |
| New-Guinea-AF038403-1998.fa | 7_D2.fas | 0.0719629 | 0 | 124/1000 |
| Nicaragua-EU482636-2005.fa | 7_D2.fas | 0.0981375 | 0 | 68/1000 |
| Peru-EU056811-1995.fa | 7_D2.fas | 0.110193 | 0 | 52/1000 |
| Philippine-KU517847-2015.fa | 7_D2.fas | 0.0843302 | 0 | 93/1000 |
| Samoa-HM582105-1972.fa | 7_D2.fas | 0.105264 | 0 | 58/1000 |
| Singapore-JN851123-2004.fa | 7_D2.fas | 0.0719629 | 0 | 124/1000 |
| Taiwan-HQ891024-2008.fa | 7_D2.fas | 0.0744324 | 0 | 117/1000 |
| Thailand-DQ181797-2001.fa | 7_D2.fas | 0.101551 | 0 | 63/1000 |
| Thailand-DQ181801-1990.fa | 7_D2.fas | 0.0872439 | 0 | 87/1000 |
| Thailand-FJ639832-2001.fa | 7_D2.fas | 0.102997 | 0 | 61/1000 |
| Thailand-FJ906957-1996.fa | 7_D2.fas | 0.0962153 | 0 | 71/1000 |
| Thailand-GQ868543-1995.fa | 7_D2.fas | 0.0968463 | 0 | 70/1000 |
| USA-EU529695-1994.fa | 7_D2.fas | 0.0981375 | 0 | 68/1000 |
| USA-JF730055-2009.fa | 7_D2.fas | 0.0744324 | 0 | 117/1000 |
| Venezuela-GQ868540-1990.fa | 7_D2.fas | 0.0962153 | 0 | 71/1000 |
| Vietnam-EU482445-2006.fa | 7_D2.fas | 0.106047 | 0 | 57/1000 |
| Vietnam-EU482774-2004.fa | 7_D2.fas | 0.101551 | 0 | 63/1000 |
| Vietnam-EU482788-2003.fa | 7_D2.fas | 0.0955937 | 0 | 72/1000 |
| Vietnam-FJ410215-2008.fa | 7_D2.fas | 0.104495 | 0 | 59/1000 |
| Vietnam-JF730049-2007.fa | 7_D2.fas | 0.11197 | 0 | 50/1000 |
| Vietnam-JN819418-1988.fa | 7_D2.fas | 0.0981375 | 0 | 68/1000 |
| Virgin-Islands-FJ898450-1990.fa | 7_D2.fas | 0.100152 | 0 | 65/1000 |

**Supplementary table 1: List of the primers for Serotyping and Quantification**

| **Primer name** | **Sequence** |
| --- | --- |
| DENV2-F  DENV2-R  DENV2-Probe  DENV4-F  DENV4-R  DENV4-Probe  DENV1-F  DENV1-R  DENV1-Probe  DENV3-F  DENV3-R  DENV3-Probe | 5’ – TCCATACACGCCAAACATGAA – 3’  5’ – GGGATTTCCTCCCATGATTCC – 3’  5' – FAM – AGGGTGTGGATTCGAGAAAACCCATGG – 3' – BHQ  5' – GYGTGGTGAAGCCTCTRGAT – 3'  5' – AGTGARCGGCCATCCTTCAT – 3'  5' – CYAN500 – ACTTCCCTCCTCTTYTTGAACGACATGGGA – 3' – BHQ  5' – ATCCATGCCCAYCACCAAT – 3'  5' – TGTGGGTTTTGTCCTCCATC – 3'  5' – FAM – TCAGTGTGGAATAGGGTTTGGATAGAGGAA – 3' – BHQ  5' – TTTCTGCTCCCACCACTTTC – 3'  5' – CCATCCYGCTCCTTGAGA – 3'  5' – CYAN500 – AAGAAAGTTGGTAGTTCCCTGCAGACCCA – 3' – BHQ |

# Supplementary table 2: List of the primers for DENV-2 whole genome sequencing

# Pool 1

| **Forward Primer**  **Name** | **Forward Primer Sequence** | **Reverse Primer Name** | **Reverse Primer Sequence** |
| --- | --- | --- | --- |
| DV2-400bp-F1 | GTCTACGTGGACCRACAAAG | DV2-400bp-R1 | ACGATCATGTGTGGTTCTCC |
| DV2-400bp-F3 | GGGTTCAGGAAAGAGATYGG | DV2-400bp-R3 | GCCCCTTCTGATGACATCC |
| DV2-400bp-F5 | GTATCAGGAGGRAGYTGGGT | DV2-400bp-R5 | CCATGTTTTCCTGTGTCATTWCC |
| DV2-400bp-F7 | TGGTCACTTTCAAAAATCCYCA | DV2-400bp-R7 | CGAATGGAGGTTCTGCTTCTAT |
| DV2-400bp-F9 | TCCACCAAGTYTTYGGAGC | DV2-400bp-R9 | TCTGGTGTTATTTGTYTCCACAT |
| DV2-400bp-F11-Ver2 | AAYCACACCTTTCTYATTGATGG | DV2-400bp-R11-Ver2 | CCWTCGCAGARATCRAAGTCCAT |
| DV2-400bp-F13 | AATGGTGCTGYCGATCTTG | DV2-400bp-R13 | TCATCAATTCCTTGGAGGTCA |
| DV2-400bp-F15 | GACCTCCAAGGAATTRATGATG | DV2-400bp-R15 | GCCACTAATGGWCCTGTCAT |
| DV2-400bp-F17 | GGATTGCTAGTGATCTCAGGA | DV2-400bp-R17 | CCAGAGATACRGCRCCTAT |
| DV2-400bp-F19** | TCCAGGAGCRGGAAARAC | DV2-400bp-R19** | ACGAACGCTCAGGGATTTC |
| DV2-400bp-F21 | AGACGCTGCATGAAACCAG | DV2-400bp-R21 | ATCAAAACACCACYTTCTGTCT |
| DV2-400bp-F23 | GGTAGACTTCCAACWTTCATGAC | DV2-400bp-R23 | TCTCGTTTGCCATGGTTGC |
| DV2-400bp-F25 | TGTCAAAAATGGAYATYGGAG | DV2-400bp-R25 | AATGTTAGCCATTGACACYGC |
| DV2-400bp-F27-Ver2 | GGAGAAACGGACCAYCAYGC | DV2-400bp-R27-Ver2 | GATTCCTCACCAARGCTCCTCC |
| DV2-400bp-F29 | TGGCACTATGAYCAAGAYCA | DV2-400bp-R29 | CACATGTTTCACACTTYCCTTC |
| DV2-400bp-F31 | AAGGAGGAGCMATGTAYGC | DV2-400bp-R31 | TCCACTGATGGCCATTCTTG |
| DV2-400bp-F33 | TYCCATGCAGAAAYCAAGATGA | DV2-400bp-R33 | GGATGTTCTTTGCCCAKGT |
| DV2-400bp-F35 | AGAAAACCCATGGATGGAAGA | DV2-400bp-R35 | CCTCCTCAGGTGGAGCTAC |

**Pool 2**

| **Forward Primer**  **Name** | **Forward Primer Sequence** | **Reverse Primer Name** | **Reverse Primer Sequence** |
| --- | --- | --- | --- |
| DV2-400bp-F2 | GCTAAGCTTAACGTAGTTCTAACAG | DV2-400bp-R2 | ACGATCATGTGTGGTTCTCC |
| DV2-400bp-F4 | AGAAGAGAAAAAAGATCAGTGGC | DV2-400bp-R4 | TTGGCTTCCGTTTTTRTCAGTTC |
| DV2-400bp-F6 | GCATTGTGACCTGTGCTATGT | DV2-400bp-R6 | TCTGTGGCTCCTGTGAGTG |
| DV2-400bp-F8-Ver2 | AAATAGCAGAAACACAACATGGAAC | DV2-400bp-R8-Ver2 | GCTRCGTGARTTCATTCCTATCC |
| DV2-400bp-F10 | GCAYACGTGGACAGARCA | DV2-400bp-R10 | GYGAGTTCCAAGCTCTRTT |
| DV2-400bp-F12 | CACCCTCTGGAGYAATGRAGT | DV2-400bp-R12 | TCGTGTCCTGAGCATTTCYTC |
| DV2-400bp-F14-Ver2 | TGCTYAGGACCCGARTRGGAA | DV2-400bp-R14-Ver2 | GTGCAGCTCACYTTCCATGC |
| DV2-400bp-F16 | CATGGCAGTYGGGATGGT | DV2-400bp-R16 | GTGAAGGGACRTCCCACA |
| DV2-400bp-F18 | CTCGAAGGAGAATGGAAGGA | DV2-400bp-R18 | CTCTGAGAGCTTCYTCCATTTC |
| DV2-400bp-F20 | TTTCAACTCGAGTRGAGATGGG | DV2-400bp-R20 | CCTCTTCTTTGYGCTGCRCT |
| DV2-400bp-F22-Ver2 | TAYCGCTTGAGAGGRGARGC | DV2-400bp-R22-Ver2 | CATYCCCAGGGTCATYTTYCC |
| DV2-400bp-F24 | TGCTCATTCCAGARCCAGAAAA | DV2-400bp-R24 | TCCTGGCCCTATRATRGCRTA |
| DV2-400bp-F26 | ATGATGAGGACYACATGGGC | DV2-400bp-R26 | CAATAGTATGACCAGCCYCC |
| DV2-400bp-F28 | ACACCCAATTTTGCRTAAARGT | DV2-400bp-R28 | ACCATGGATGATGCTGATCC |
| DV2-400bp-F30-Ver2 | AYGAGAACAAGTGGAARTCRGC | DV2-400bp-R30-Ver2 | TRTCCATTACTGTKCCTCTTGG |
| DV2-400bp-F32 | GACAGATGGAGGGAGAAGGA | DV2-400bp-R32 | CCACATTTGGGCGTAAGACTT |
| DV2-400bp-F34 | TCCCATCACAYTGGGTTCC | DV2-400bp-R34 | ATGGCTTAATCCGACCTGAC |
